# Supplementary material for: Peptide nano-blanket impedes fibroblasts activation and subsequent formation of pre-metastatic niche
Source: Research Square preprint supplement (doi:10.21203/rs.3.rs-699014/v1), 2021-08-10
Supplement: Supplementary file 2 [file 7dd7de17df9d99954e454d31.pdf]

Corresponding author(s): DBPR  
# NCOMMS-21-30632-T

Last updated by author(s): Aug 7, 2021

## Reporting Summary

Nature Portfolio wishes to improve the reproducibility of the work that we publish. This form provides structure for consistency and transparency in reporting. For further information on Nature Portfolio policies, see our [Editorial Policies](#) and the [Editorial Policy Checklist](#).

### Statistics

For all statistical analyses, confirm that the following items are present in the figure legend, table legend, main text, or Methods section.

n/a Confirmed

- ☐ ☒ The exact sample size ( $n$ ) for each experimental group/condition, given as a discrete number and unit of measurement
- ☐ ☒ A statement on whether measurements were taken from distinct samples or whether the same sample was measured repeatedly
- ☐ ☒ The statistical test(s) used AND whether they are one- or two-sided  
*Only common tests should be described solely by name; describe more complex techniques in the Methods section.*
- ☐ ☒ A description of all covariates tested
- ☐ ☒ A description of any assumptions or corrections, such as tests of normality and adjustment for multiple comparisons
- ☐ ☒ A full description of the statistical parameters including central tendency (e.g. means) or other basic estimates (e.g. regression coefficient) AND variation (e.g. standard deviation) or associated estimates of uncertainty (e.g. confidence intervals)
- ☐ ☒ For null hypothesis testing, the test statistic (e.g.  $F$ ,  $t$ ,  $r$ ) with confidence intervals, effect sizes, degrees of freedom and  $P$  value noted  
*Give  $P$  values as exact values whenever suitable.*
- ☒ ☐ For Bayesian analysis, information on the choice of priors and Markov chain Monte Carlo settings
- ☒ ☐ For hierarchical and complex designs, identification of the appropriate level for tests and full reporting of outcomes
- ☐ ☒ Estimates of effect sizes (e.g. Cohen's  $d$ , Pearson's  $r$ ), indicating how they were calculated

Our web collection on [statistics for biologists](#) contains articles on many of the points above.

### Software and code

Policy information about [availability of computer code](#)

Data collection

Data was collected using the software of the instrument described in each experiment. Confocal data was collected using Zeiss Zen software and Leica Application Suite X (LAS X) software. IVIS data was collected using Living Image software (Perkin Elmer). Plate reader data was collected using BioTek Gen5 software. Flow cytometry data was collected using BD FACSDiva software v8.0.1. Size distribution data was collected using Zetasizer software.

Data analysis

All statistical analysis were performed on Graphpad Prism 8.0.1. Flowcytometry data were analyzed on FlowJo software package (FlowJo V10). Chemical structures were drawn using Chemdraw v15.0. Images were analyzed by ImageJ.

For manuscripts utilizing custom algorithms or software that are central to the research but not yet described in published literature, software must be made available to editors and reviewers. We strongly encourage code deposition in a community repository (e.g. GitHub). See the Nature Portfolio [guidelines for submitting code & software](#) for further information.

### Data

Policy information about [availability of data](#)

All manuscripts must include a [data availability statement](#). This statement should provide the following information, where applicable:

- Accession codes, unique identifiers, or web links for publicly available datasets
- A description of any restrictions on data availability
- For clinical datasets or third party data, please ensure that the statement adheres to our [policy](#)

The sorted CD11b+Ly6g+ MDSC RNAseq data are available on GEO (Accession: PRJNA752692 ID: 752692). Other data that support the findings of this study are available within the paper and its supplementary information files, or are available from the corresponding authors upon reasonable request.

## Field-specific reporting

Please select the one below that is the best fit for your research. If you are not sure, read the appropriate sections before making your selection.

☒ Life sciences ☐ Behavioural & social sciences ☐ Ecological, evolutionary & environmental sciences

For a reference copy of the document with all sections, see [nature.com/documents/nr-reporting-summary-flat.pdf](https://www.nature.com/documents/nr-reporting-summary-flat.pdf)

## Life sciences study design

All studies must disclose on these points even when the disclosure is negative.

|                 |                                                                                                                                                          |
|-----------------|----------------------------------------------------------------------------------------------------------------------------------------------------------|
| Sample size     | Sample sizes were based on previously published work of a similar nature, and chosen to meet the current standards for in vivo and in vitro experiments. |
| Data exclusions | No sample or data was excluded for analysis.                                                                                                             |
| Replication     | All experiments were repeated for at least three times and experimental findings were reproducible.                                                      |
| Randomization   | The experimental groups were allocated randomly.                                                                                                         |
| Blinding        | When possible, investigators were blinded to the identities of the samples' treatment group during data analysis.                                        |

## Reporting for specific materials, systems and methods

We require information from authors about some types of materials, experimental systems and methods used in many studies. Here, indicate whether each material, system or method listed is relevant to your study. If you are not sure if a list item applies to your research, read the appropriate section before selecting a response.

### Materials & experimental systems

| n/a                                 | Involved in the study                                           |
|-------------------------------------|-----------------------------------------------------------------|
| <input type="checkbox"/>            | <input checked="" type="checkbox"/> Antibodies                  |
| <input type="checkbox"/>            | <input checked="" type="checkbox"/> Eukaryotic cell lines       |
| <input checked="" type="checkbox"/> | <input type="checkbox"/> Palaeontology and archaeology          |
| <input type="checkbox"/>            | <input checked="" type="checkbox"/> Animals and other organisms |
| <input checked="" type="checkbox"/> | <input type="checkbox"/> Human research participants            |
| <input checked="" type="checkbox"/> | <input type="checkbox"/> Clinical data                          |
| <input checked="" type="checkbox"/> | <input type="checkbox"/> Dual use research of concern           |

### Methods

| n/a                                 | Involved in the study                              |
|-------------------------------------|----------------------------------------------------|
| <input checked="" type="checkbox"/> | <input type="checkbox"/> ChIP-seq                  |
| <input type="checkbox"/>            | <input checked="" type="checkbox"/> Flow cytometry |
| <input checked="" type="checkbox"/> | <input type="checkbox"/> MRI-based neuroimaging    |

## Antibodies

### Antibodies used

The following primary antibodies and secondary antibody were used for western blotting.

Anti-Fibronectin (1:500, Cat. ab2413, Abcam, UK),  
 Anti-MMP9 (1:1000, Cat. ab38898, Abcam, UK),  
 Anti-VEGFa (1:500, Cat. ab119, Abcam, UK),  
 Anti-TGF- $\beta$ 1 (1:1000, Cat. ab179695, Abcam, UK),  
 Anti-iNOS (1:1000, Cat. ab204017, Abcam, UK),  
 Anti-Arginase 1 (1:1000, Cat. ab124917, Abcam, UK),  
 Anti-GAPDH (1:10000, Cat. ab181602, Abcam),  
 Anti-Versican (1:1000, Cat. ab270445, Abcam, UK),  
 Anti-ANG2 (1:500, Cat. ab155106, Abcam, UK),  
 Anti-MMP2 (1:500, Cat. ab97779, Abcam, UK),  
 Goat anti-Mouse IgG (H+L) (1:5000, Cat. 31160, Thermo Pierce),  
 Goat anti-Rabbit IgG (H+L) (1:5000, Cat. 31210, Thermo Pierce).

The following primary antibodies and secondary antibody were used for immunofluorescence.

Anti-VE-cadherin antibody (1:1000, Cat. Ab205336, Abcam, UK),  
 AF647 labeled goat anti-rabbit IgG (H+L) (1:100, Cat. 33113ES60, Yeasen, China),  
 Anti- $\alpha$ SMA (1:500, Cat. Ab7817, Abcam, UK),  
 Anti-CD34 (1:500, Cat. Ab81289, Abcam, UK),  
 Anti-MMP2 (1:200, Cat. 10373-2-ap, PTG, USA),  
 Anti-MMP9 (1:1000, Cat. ab228402, Abcam, UK),  
 Anti-periostin (1:200, Cat. 19899-1-AP, PTG, USA),

Anti-LOX (1:200, Cat. ab174316, Abcam, UK),  
 Anti-Fibronectin (1:200, Cat. ab92572, Abcam, UK),  
 Anti-CD11b (1:2000, Cat. ab133357, Abcam, UK),  
 Anti-Gr-1 (1:200, Cat. ab25377, Abcam, UK),  
 Cy3 conjugated goat anti-rabbit IgG (1:500, Cat. 111-165-003, Jackson, USA),  
 goat anti-rabbit IgG conjugated to HRP (1:2000, Cat. ab6721, Abcam, UK).

The following primary antibodies were used for flowcytometry and FACS.

FITC-antimouse-CD45 (Cat. 553079, BD, USA),  
 PE-antimouse-NK1.1 (Cat. 108708, Biolegend, USA),  
 PE-antimouse-CD3 (Cat. 100205, Biolegend, USA),  
 PE-antimouse-TER119 (Cat. 116207, Biolegend, USA),  
 PE-antimouse-CD19 (Cat. 152407, Biolegend, USA),  
 APC-antimouse-CD11b (Cat. 101211, Biolegend, USA),  
 BV605-antimouse-MHC II (Cat. 107639, Biolegend, USA),  
 BB700-CD11c (Cat. 566505, BD, USA),  
 BV421-antimouse-Ly6c (Cat. 562727, BD, USA),  
 PE/CF594-antimouse-Ly6g (Cat. 562700, BD, USA),  
 BV711-antimouse-F4/80 (Cat. 123147, Biolegend, USA),  
 PE/Cy7-antimouse-CD103 (Cat. 121426, Biolegend, USA),  
 BV650-antimouse-CD206 (Cat. 141723, Biolegend, USA),  
 PE/Cy7-antimouse-Ly6g (Cat. 127617, Biolegend, USA)

Antibody anti-PD1 (Cat. BE0146, Bio X Cell, USA) was used for in vivo study.

## Validation

All antibodies were verified by the supplier and each lot has been quality tested. All the antibodies used are from commercial sources and have been validated by the vendors. Validation data are available on the manufacturer's website.

For WB:

Anti-Fibronectin: rabbit, suitable for ICC/IF, WB, IHC-P, reacts with mouse, human;  
 Anti-MMP9: rabbit, suitable for IHC-Fr, WB, reacts with mouse, human, recombinant fragment;  
 Anti-VEGFA: mouse, reacts with human, mouse, rat, pig;  
 Anti-TGF- $\beta$ 1: rabbit, suitable for WB, reacts with mouse, rat, human, recombinant fragment;  
 Anti-iNOS: Rabbit, suitable for WB, reacts with mouse, rat, human;  
 Anti-Arginase: Rabbit, suitable for WB, reacts with mouse, human;  
 Anti-GAPDH: Rabbit, suitable for Flow Cyt (Intra), WB, IHC-P, ICC/IF, IP, reacts with mouse, rat, chicken, human, zebrafish, african green monkey, xenopus tropicalis;  
 Anti-Versican: rabbit, suitable for WB, IHC-P, reacts with mouse, human;  
 Anti-ANG2: rabbit, suitable for WB, reacts with mouse, rat, human;  
 Anti-MMP2: rabbit, suitable for IHC-P, IP, ICC/IF, WB, reacts with human;  
 Goat anti-Mouse IgG (H+L): goat, suitable for WB, IHC, ICC/IF, Flow, ELISA, IP, Misc, reacts with mouse;  
 Goat anti-Rabbit IgG (H+L): goat, suitable for WB, IHC, ICC/IF, Flow, IP, ChIP, Misc, reacts with rabbit.

For immunofluorescence:

Anti-VE-cadherin: rabbit, suitable for ICC/IF, WB, IHC-P, reacts with mouse;  
 AF647 labeled goat anti-rabbit IgG (H+L): goat, has been tested for specific binding with Complete rabbit IgG by ELISA;  
 Anti- $\alpha$ SMA: mouse, suitable for ICC, IHC-P, WB, Flow Cyt, reacts with rat, human, predicted and reported to react with mouse;  
 Anti-CD34: rabbit, suitable for WB, IHC-P, ICC/IF, IP, IHC-Fr, Flow Cyt, reacts with mouse, rat, human;  
 Anti-MMP2: rabbit, suitable for IF, IHC, IP, WB, ELISA, reacts with human, mouse, rat;  
 Anti-MMP9: rabbit, suitable for IP, IHC-P, IHC-Fr, WB, reacts with mouse, rat;  
 Anti-periostin: rabbit, suitable for IF, IHC, ELISA, WB, reacts with human, mouse, rat;  
 Anti-LOX: rabbit, suitable for WB, IHC-P, ICC/IF, IP, Flow Cyt, reacts with mouse, rat, human;  
 Anti-Fibronectin: rabbit, suitable for WB, IP, IHC-P, ICC, Flow Cyt, react swith mouse, rat, human;  
 Anti-CD11b: rabbit, suitable for WB, IHC-P, reacts with mouse, rat, human;  
 Anti-Gr-1: rat, suitable for IHC-Fr, reacts with mouse;  
 Cy3 conjugated goat anti-rabbit IgG: mouse, suitable for ICC/IF, WB, IP, ICC, IHC-Fr, reacts with human, mammals;  
 goat anti-rabbit IgG conjugated to HRP: goat, suitable for IHC-P, WB, ELISA, Immunomicroscopy, Dot blot, ICC, IHC-Fr, reacts with rabbit.

For Flow Cytometry:

FITC-antimouse-CD45: rat, suitable for Flow Cyt, reacts with mouse;  
 PE-antimouse-NK1.1: mouse, suitable for Flow Cyt, reacts with mouse;  
 PE-antimouse-CD3: rat, suitable for Flow Cyt, reacts with mouse;  
 PE-antimouse-TER119: rat, suitable for Flow Cyt, reacts with mouse;  
 PE-antimouse-CD19: rat, suitable for Flow Cyt, reacts with mouse;  
 APC-antimouse-CD11b: rat, suitable for Flow Cyt, reacts with mouse, human;  
 BV605-antimouse-MHC II: rat, suitable for Flow Cyt, reacts with mouse;  
 BB700-CD11c: hamster, suitable for Flow Cyt, reacts with mouse;  
 BV421-antimouse-Ly6c: rat, suitable for Flow Cyt, Immunofluorescence, reacts with mouse;  
 PE/CF594-antimouse-Ly6g: rat, suitable for Flow Cyt, reacts with mouse;

BV711-antimouse-F4/80: rat, suitable for Flow Cyt, reacts with mouse;  
 PE/Cy7-antimouse-CD103: Armenian Hamster, suitable for Flow Cyt, reacts with mouse;  
 BV650-antimouse-CD206: rat, suitable for ICFC, Flow Cyt, reacts with mouse;  
 PE/Cy7-antimouse-Ly6g: rat, suitable for Flow Cyt, reacts with mouse.

For in vivo experiment:

Antibody anti-PD1: Syrian Hamster BKH cells transfected with mouse PD-1 cDNA, has been reported applicated for in vivo blocking of PD-1/PD-L signaling.

## Eukaryotic cell lines

Policy information about [cell lines](#)

|                                                                      |                                                                                                                                                                                                                                                                                                                                                                                                                                                                                                                                                                                                                 |
|----------------------------------------------------------------------|-----------------------------------------------------------------------------------------------------------------------------------------------------------------------------------------------------------------------------------------------------------------------------------------------------------------------------------------------------------------------------------------------------------------------------------------------------------------------------------------------------------------------------------------------------------------------------------------------------------------|
| Cell line source(s)                                                  | The B16F10 cells were purchased from the Cell Bank of Chinese Academy of sciences (Shanghai, China) which was originally obtained from the American Type Culture Collection (Manassas, USA). The mouse lung fibroblasts (MLF) were purchased from iCell Bioscience Inc. (Shanghai, China) which were originally isolated from mice pulmonary tissues and then transfected with SV40 through lentiviral. The bEnd3 cells were originally opurchased from the Cell Bank of Chinese Academy of sciences (Shanghai, China) which was originally obtained from the American Type Culture Collection (Manassas, USA). |
| Authentication                                                       | Cell lines were not further authenticated after their receipt from the source.                                                                                                                                                                                                                                                                                                                                                                                                                                                                                                                                  |
| Mycoplasma contamination                                             | No mycoplasma contamination was found.                                                                                                                                                                                                                                                                                                                                                                                                                                                                                                                                                                          |
| Commonly misidentified lines<br>(See <a href="#">ICLAC</a> register) | None of the cell lines used are listed in the ICLAC list.                                                                                                                                                                                                                                                                                                                                                                                                                                                                                                                                                       |

## Animals and other organisms

Policy information about [studies involving animals](#); [ARRIVE guidelines](#) recommended for reporting animal research

|                         |                                                                                                                                                                                                                                                                     |
|-------------------------|---------------------------------------------------------------------------------------------------------------------------------------------------------------------------------------------------------------------------------------------------------------------|
| Laboratory animals      | C57BL/6 mice (male, 5-week-old) purchased from Slaccas (Shanghai, China) were adaptive fed for more than one week for subsequent experiments. The animals were maintained under standard laboratory housing conditions where foods and water can be reached freely. |
| Wild animals            | No wild animals were used in this study.                                                                                                                                                                                                                            |
| Field-collected samples | No field-collected samples were used in this study.                                                                                                                                                                                                                 |
| Ethics oversight        | All the animal experiments were conducted following the guidelines which have been approved by the Ethics Committee of our organization (blinded according to DBPR).                                                                                                |

Note that full information on the approval of the study protocol must also be provided in the manuscript.

## Flow Cytometry

### Plots

Confirm that:

- ☒ The axis labels state the marker and fluorochrome used (e.g. CD4-FITC).
- ☒ The axis scales are clearly visible. Include numbers along axes only for bottom left plot of group (a 'group' is an analysis of identical markers).
- ☒ All plots are contour plots with outliers or pseudocolor plots.
- ☒ A numerical value for number of cells or percentage (with statistics) is provided.

### Methodology

|                           |                                                                                                                                                                                                                                                                                                                                                                                                                                                                                                                                                                                                                                                                                                                                                                                                                                                                                                                                                                        |
|---------------------------|------------------------------------------------------------------------------------------------------------------------------------------------------------------------------------------------------------------------------------------------------------------------------------------------------------------------------------------------------------------------------------------------------------------------------------------------------------------------------------------------------------------------------------------------------------------------------------------------------------------------------------------------------------------------------------------------------------------------------------------------------------------------------------------------------------------------------------------------------------------------------------------------------------------------------------------------------------------------|
| Sample preparation        | For flow cytometry analysis, lung tissues harvested from mice were mechanically minced into 1-2 mm pieces using scissors and then dissociated into single cell suspension at 37 °C on a shaker for 30 min by enzymes. The digesting solution contains 2 mg/mL collagenase I (Cat. BS163, BioSharp, Germany), 2 mg/mL collagenase II (Cat. BS164, BioSharp, Germany) and DNase I (Cat. KGF008, KeyGEN BioTech., China). Digestion was stopped by adding 2 volumes PBS and filtered through a 70 µm cell strainer (Cat. CSS013070, Jet BIOFIL®, China). The cell suspension was centrifuged at 400 g for 5 min to discard the supernatant. Cell precipitations were then resuspended in 5 mL RBC lysis buffer (Cat. R1010, Solarbio, China) and centrifuged again to discard the supernatant. The single-cell-suspensions washed with PBS and resuspended were incubated with antibodies according to the manufacturer's protocols, and then analyzed by flow cytometry. |
| Instrument                | BD Fortessa                                                                                                                                                                                                                                                                                                                                                                                                                                                                                                                                                                                                                                                                                                                                                                                                                                                                                                                                                            |
| Software                  | FlowJo software package (Flowjo V10)                                                                                                                                                                                                                                                                                                                                                                                                                                                                                                                                                                                                                                                                                                                                                                                                                                                                                                                                   |
| Cell population abundance | In general, cells were first gated on FSC/SSC. Singlet cells were gated using FSC-H and FSC-A.                                                                                                                                                                                                                                                                                                                                                                                                                                                                                                                                                                                                                                                                                                                                                                                                                                                                         |

Gating strategy

Further gating strategies were determined in preliminary experiments and presented in detail in supplementary information (Supplementary Figure 7 & Supplementary Figure 13).

☒ Tick this box to confirm that a figure exemplifying the gating strategy is provided in the Supplementary Information.
